# Supplementary material
Source: PubMed Central journal article supplement (PMC5554010)
Supplement: NIHMS881554-supplement-1.pdf [file NIHMS881554-supplement-1.pdf]

**Supplemental Table 1. *Tsc2*<sup>+/-</sup> extra-renal tumorigenesis is HMGA2 dependent.**

| Origin Of Tumor | Tsc2 <sup>+/-</sup> Hmga2 <sup>+/+</sup> and Tsc2 <sup>+/-</sup> Hmga2 <sup>+/-</sup> (n=227) |     |         |       |      | Tsc2 <sup>+/-</sup> Hmga2 <sup>-/-</sup> (n=19) |     |         |       |      |
|-----------------|-----------------------------------------------------------------------------------------------|-----|---------|-------|------|-------------------------------------------------|-----|---------|-------|------|
|                 | A2                                                                                            | BP2 | Tuberin | pmTOR | pS6K | A2                                              | BP2 | Tuberin | pmTOR | pS6K |
| Kidney          | 100                                                                                           | 100 | 86      | 30    | 30   | 0                                               | 0   | 81      | 31    | 31   |
| Lung            | 100                                                                                           | 100 | 100     | 0     | 0    |                                                 |     |         |       |      |
| Liver           | 100                                                                                           | 100 | 100     | 0     | 0    | No Tumors                                       |     |         |       |      |
| ExH             | 100                                                                                           | 100 | 100     | 0     | 0    |                                                 |     |         |       |      |

Summary of IHC analysis of HMGA2 (A2), IGF2BP2 (BP2), tuberin, p-mTOR (pmTOR) and p-p70 S6 kinase (pS6K) of tumors from *Tsc2*<sup>+/-</sup> mice. Data are presented as the percentage of samples that stained positive for each antibody and n denotes number of tumors analyzed.

**Supplemental Table 2. Summary of human AML LOH analysis.**

| Patient | Tumor | Tuberin | Marker Positive  |
|---------|-------|---------|------------------|
| 16      | AML   | +       | No LOH           |
| 17      | AML   | -       | D16S525, D16S283 |
| 18      | AML   | +       | No LOH           |
| 19      | AML   | +       | No LOH           |
| 20      | AML   | -       | D16S283          |
| 21      | AML   | -       | D16S283, D16S291 |
| 23      | AML   | +       | No LOH           |
| 24      | AML   | +       | No LOH           |
| 26      | AML   | +       | No LOH           |
| 9019    | AML   | +       | No LOH           |
| 9029    | AML   | +       | No LOH           |
| 9040    | AML   | -       | D16S283          |

*TSC2* LOH was examined for individual markers (Kg8, D16S525, D16S283 and D16S291) on chromosome 16p13 from 12 AML samples, with only tuberlin negative samples having *TSC2* LOH.
